# Supplementary material for: Effects of Oxytocin on Cell Proliferation in a Corticotroph Adenoma Cell Line
Source: PubMed Central journal article supplement — Endocrinol Metab (Seoul). 2019 Sep 26;34(3):302–13. doi: 10.3803/EnM.2019.34.3.302 (PMC6769335; doi:10.3803/enm.2019.34.3.302), 2019-09-26
Supplement: enm-34-302-s001.pdf [file enm-34-302-s001.pdf]

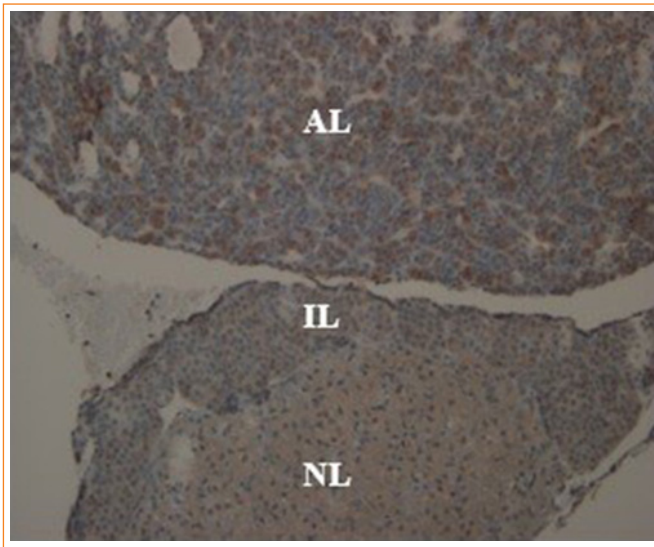

**Supplemental Fig. S1.** The distribution of oxytocin (OXT) receptor expression according to the lobe of normal mouse pituitary gland. Immunohistochemical staining shows the different expression of OXT receptor according the lobe of normal mouse pituitary gland ( $n=2$ ,  $\times 100$ ). AL, anterior lobe; IL, intermediate lobe; NL, neural lobe.
