# Supplementary material for: Effects of Oxytocin on Cell Proliferation in a Corticotroph Adenoma Cell Line
Source: PubMed Central journal article supplement — Endocrinol Metab (Seoul). 2019 Sep 26;34(3):302–13. doi: 10.3803/EnM.2019.34.3.302 (PMC6769335; doi:10.3803/enm.2019.34.3.302), 2019-09-26
Supplement: enm-34-302-s002.pdf [file enm-34-302-s002.pdf]

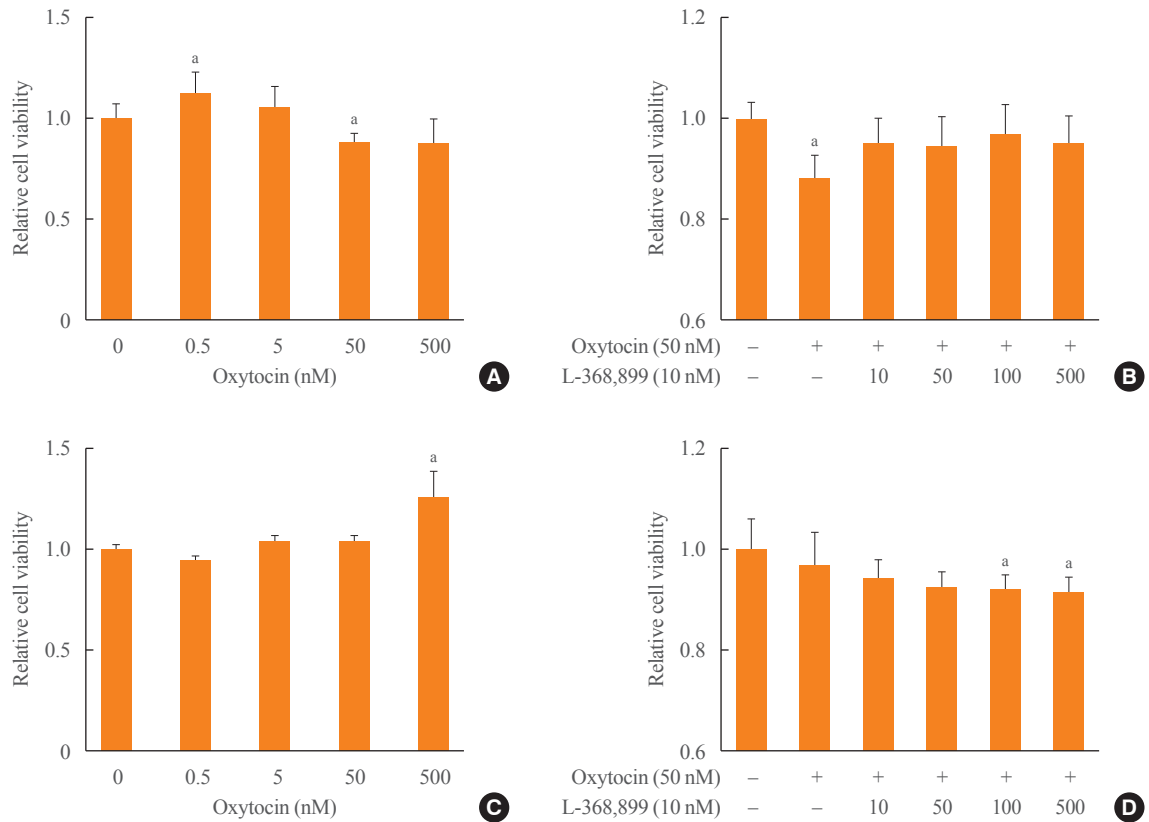

**Supplemental Fig. S2.** Effects of oxytocin (OXT) and OXT receptor antagonist on cell viability. AtT20 and GH3 cells were treated with various concentrations of OXT (0 to 500 nM) for 24 and 48 hours, respectively. (A, C) These panels demonstrate the effects of OXT on cell viability in AtT20 and GH3 cell lines, respectively. (B, D) These panels show the effects of OXT with or without OXT receptor antagonist L-368,899 (0 to 500 nM) on proliferation of AtT20 and GH3 cells, respectively. Data are presented as mean  $\pm$  standard error of the mean ( $n=3$  to 4). <sup>a</sup> $P < 0.05$  vs. OXT 0 nM.
